# Supplementary material
Source: PubMed Central journal article supplement (PMC544903)

# Supplementary Figure 1

A

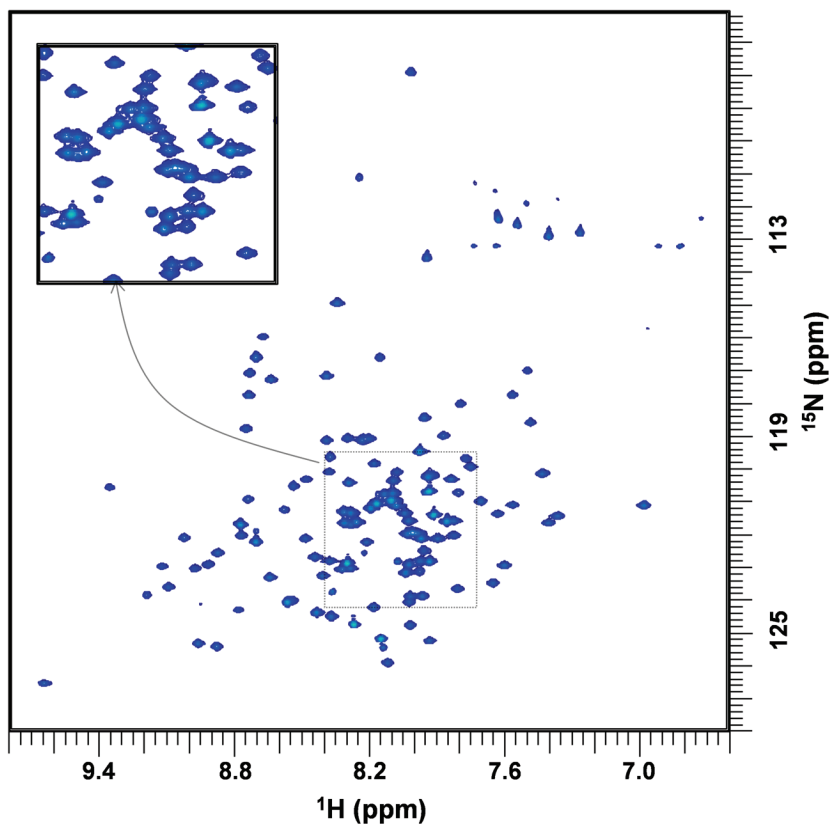

B

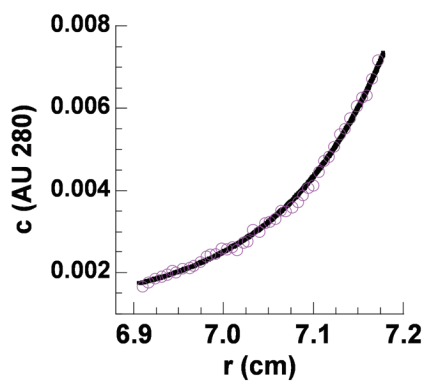

C

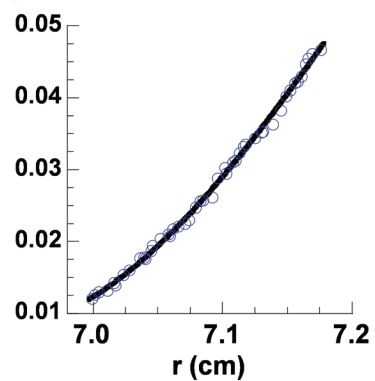

D

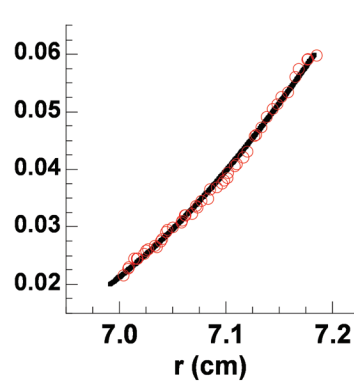

Supplement: 7600490s1.pdf [file 7600490s1.pdf]

# Supplementary Figure 2

A

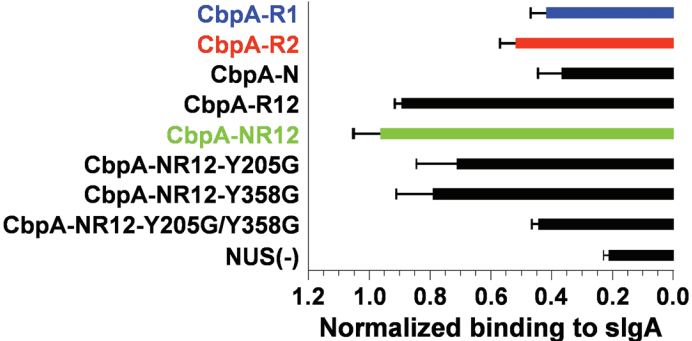

B

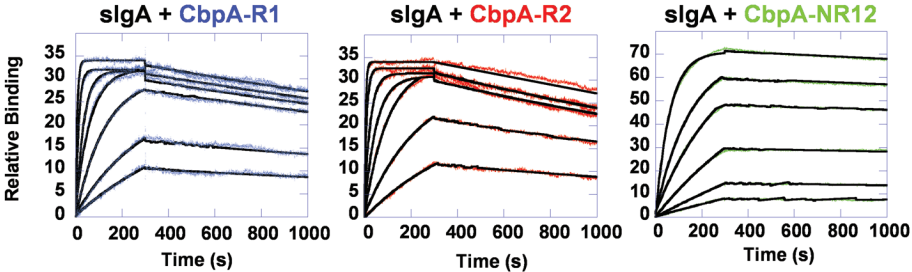

Supplement: 7600490s2.pdf [file 7600490s2.pdf]
